# Supplementary material
Source: PubMed Central journal article supplement (PMC2657446)
Supplement: 0810844106_0810844106SI.pdf [file 0810844106_0810844106SI.pdf]

# Supporting Information

Li et al. 10.1073/pnas.0810844106

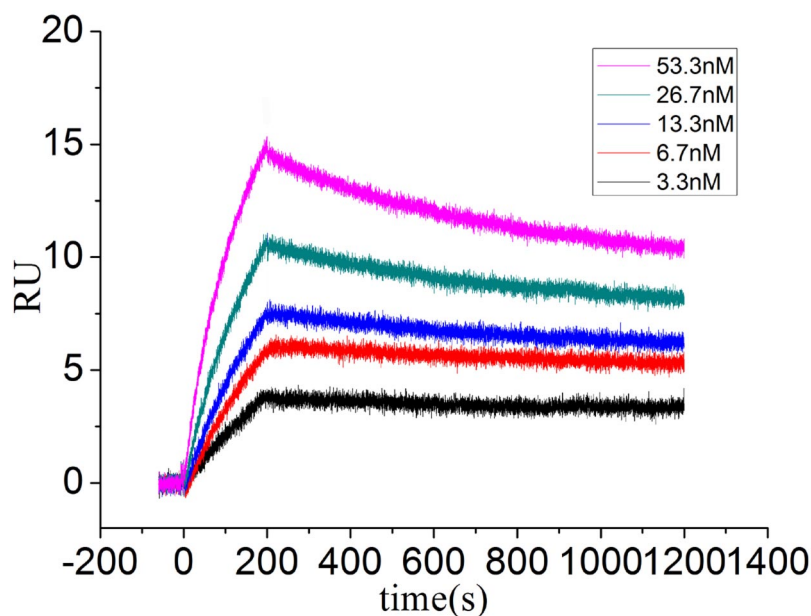

**Fig. S1.** Surface plasmon resonance (SPR) binding analysis of the Efalizumab Fab with the  $\alpha_L$  I domain. Surface plasmon resonance experiments were performed by using a BIAcore T-100 instrument (GE Healthcare). The purified  $\alpha_L$  I domain was immobilized on a CM-5 chip to a total signal of 20 BIAcore relative units (RU) by amino coupling method. The purified Efalizumab Fab fragment was diluted in PBS buffer (pH 7.4) with 1 mM  $Mg^{2+}$  and 2-fold serial dilutions of samples were injected over the test and negative control flow cells at a flow rate of  $50 \mu L/min$  at  $25^\circ C$ . The concentration series for the Fab were 3.3, 6.7, 13.3, 26.7, and 53.3 nM. The data were fitted to 1:1 binding model. The dissociation equilibrium constant ( $K_D$ ) was calculated as  $k_{off}/k_{on}$  by using BIAcore T-100 evaluation software 2.0.1. The  $K_D$  value is represented as the mean  $\pm$  SEM of 3 independent experiments. The binding affinity of the Efalizumab Fab with the I domain ( $K_D$ ) is  $2.2 \pm 0.5$  nM, which is comparable to that of MHM24 with the I domain ( $K_D = 1.9 \pm 0.4$  nM) [Shimaoka M, et al. (2006) AL-57, a ligand-mimetic antibody to integrin LFA-1, reveals chemokine-induced affinity up-regulation in lymphocytes. *Proc Natl Acad Sci USA* 103:13991–13996.].

Table S1. Summary of diffraction data and structure refinement statistics of the Efalizumab Fab/I domain complex in crystal form II

|                                          | Complex of form II      |
|------------------------------------------|-------------------------|
| Diffraction data                         |                         |
| Wavelength (Å)                           | 1.0000                  |
| Space group                              | <i>P6<sub>1</sub>22</i> |
| Resolution (Å)                           | 50.00–3.60 (3.73–3.60)* |
| Cell parameters                          |                         |
| <i>a</i> (Å)                             | 111.1                   |
| <i>b</i> (Å)                             | 111.1                   |
| <i>c</i> (Å)                             | 470.7                   |
| Observed reflections                     | 110,130 (8,862)         |
| Unique reflections ( $I/\sigma(I) > 0$ ) | 20,645 (2,014)          |
| Average redundancy                       | 5.3 (4.4)               |
| Average $I/\sigma(I)$                    | 7.5 (2.0)               |
| Completeness (%)                         | 97.8 (98.9)             |
| Rmerge (%) <sup>†</sup>                  | 20.3 (62.2)             |
| Refinement and structure model           |                         |
| Reflections ( $F_o \geq 0\sigma(F_o)$ )  |                         |
| Working set                              | 19,527                  |
| Test set                                 | 1,026                   |
| R factor <sup>‡</sup>                    | 0.267                   |
| Free R factor                            | 0.333                   |
| No. of protein atoms                     | 9,442                   |
| No. of Zn <sup>2+</sup> atoms            | 2                       |
| Average B factor (Å <sup>2</sup> )       |                         |
| All atoms                                | 97.5                    |
| Fab main chain/side chain                | 100.3/99.9              |
| I domain main chain/side chain           | 90.7/92.2               |
| Zn <sup>2+</sup>                         | 99.5                    |
| RMS deviations                           |                         |
| Bond lengths (Å)                         | 0.011                   |
| Bond angles (°)                          | 1.7                     |
| Ramachandran plot (%)                    |                         |
| Most favoured regions                    | 82.2                    |
| Additional allowed regions               | 16.7                    |
| Generously allowed regions               | 1.1                     |
| Luzzati atomic positional error (Å)      | 0.44                    |

\*Numbers in parentheses represent the highest resolution shell. <sup>†</sup>Rmerge =  $\frac{\sum_{hkl} \sum_i |I_i(hkl) - \langle I(hkl) \rangle|}{\sum_{hkl} \sum_i I_i(hkl)}$ . <sup>‡</sup>R =  $\frac{\sum_{hkl} ||F_o| - |F_c||}{\sum_{hkl} |F_o|}$ .

**Table S2. van der Waals contacts between the Efalizumab Fab and the LFA-1 I domain (<4.0 Å)**

| LFA-1 I domain residues | Efalizumab Fab residues                                                                            |
|-------------------------|----------------------------------------------------------------------------------------------------|
| Pro144 <sup>I</sup>     | Tyr49 <sup>L</sup> (2)*, Phe102 <sup>H</sup> (5), Tyr103 <sup>H</sup> (6)                          |
| Phe147 <sup>I</sup>     | Phe102 <sup>H</sup> (5)                                                                            |
| Gln148 <sup>I</sup>     | His32 <sup>H</sup> (3), Phe102 <sup>H</sup> (1)                                                    |
| Leu151 <sup>I</sup>     | Phe102 <sup>H</sup> (2)                                                                            |
| Lys155 <sup>I</sup>     | Gly31 <sup>H</sup> (1)                                                                             |
| Asp191 <sup>I</sup>     | Ser54 <sup>H</sup> (3)                                                                             |
| Asp193 <sup>I</sup>     | Thr30 <sup>H</sup> (10), Gly31 <sup>H</sup> (1), His52 <sup>H</sup> (1), Ser54 <sup>H</sup> (1)    |
| Ala194 <sup>I</sup>     | Ser54 <sup>H</sup> (6), Asp55 <sup>H</sup> (2)                                                     |
| Lys197 <sup>I</sup>     | Trp33 <sup>H</sup> (7), His52 <sup>H</sup> (7), Glu57 <sup>H</sup> (4), Tyr101 <sup>H</sup> (3)    |
| His198 <sup>I</sup>     | Glu57 <sup>H</sup> (5), Tyr101 <sup>H</sup> (4)                                                    |
| Val199 <sup>I</sup>     | Tyr101 <sup>H</sup> (1)                                                                            |
| Lys200 <sup>I</sup>     | Tyr101 <sup>H</sup> (9), Phe102 <sup>H</sup> (3), Gly104 <sup>H</sup> (4), Thr105 <sup>H</sup> (1) |
| His201 <sup>I</sup>     | Phe102 <sup>H</sup> (4), Tyr103 <sup>H</sup> (8)                                                   |
| Leu203 <sup>I</sup>     | Tyr103 <sup>H</sup> (2)                                                                            |

\*Numbers in parentheses refer to the number of van der Waals contacts.

**Table S3. Comparison of the sequential numbering scheme and the Kabat numbering scheme of the amino acid residues of the Efalizumab Fab used in this work**

| Sequential numbering | Kabat numbering      |
|----------------------|----------------------|
| Tyr49 <sup>L</sup>   | Tyr49 <sup>L</sup>   |
| His91 <sup>L</sup>   | His91 <sup>L</sup>   |
| Asn92 <sup>L</sup>   | Asn92 <sup>L</sup>   |
| Tyr94 <sup>L</sup>   | Tyr94 <sup>L</sup>   |
| Thr30 <sup>H</sup>   | Thr30 <sup>H</sup>   |
| Gly31 <sup>H</sup>   | Gly31 <sup>H</sup>   |
| His32 <sup>H</sup>   | His32 <sup>H</sup>   |
| Trp33 <sup>H</sup>   | Trp33 <sup>H</sup>   |
| His52 <sup>H</sup>   | His52 <sup>H</sup>   |
| Ser54 <sup>H</sup>   | Ser53 <sup>H</sup>   |
| Asp55 <sup>H</sup>   | Asp54 <sup>H</sup>   |
| Glu57 <sup>H</sup>   | Glu56 <sup>H</sup>   |
| Gln62 <sup>H</sup>   | Gln61 <sup>H</sup>   |
| Lys65 <sup>H</sup>   | Lys64 <sup>H</sup>   |
| Lys74 <sup>H</sup>   | Lys73 <sup>H</sup>   |
| Tyr101 <sup>H</sup>  | Tyr97 <sup>H</sup>   |
| Phe102 <sup>H</sup>  | Phe98 <sup>H</sup>   |
| Tyr103 <sup>H</sup>  | Tyr99 <sup>H</sup>   |
| Gly104 <sup>H</sup>  | Gly100 <sup>H</sup>  |
| Thr105 <sup>H</sup>  | Thr100A <sup>H</sup> |
| Tyr107 <sup>H</sup>  | Tyr100C <sup>H</sup> |
